# Supplementary material for: SIRT3 is attenuated in systemic sclerosis skin and lungs, and its pharmacologic activation mitigates organ fibrosis
Source: PubMed Central journal article supplement (PMC5342480; doi:10.18632/oncotarget.12504), 2016-10-06
Supplement: oncotarget-07-69321-s001.pdf [file oncotarget-07-69321-s001.pdf]

# SIRT3 is attenuated in systemic sclerosis skin and lungs, and its pharmacologic activation mitigates organ fibrosis

## Supplementary Material

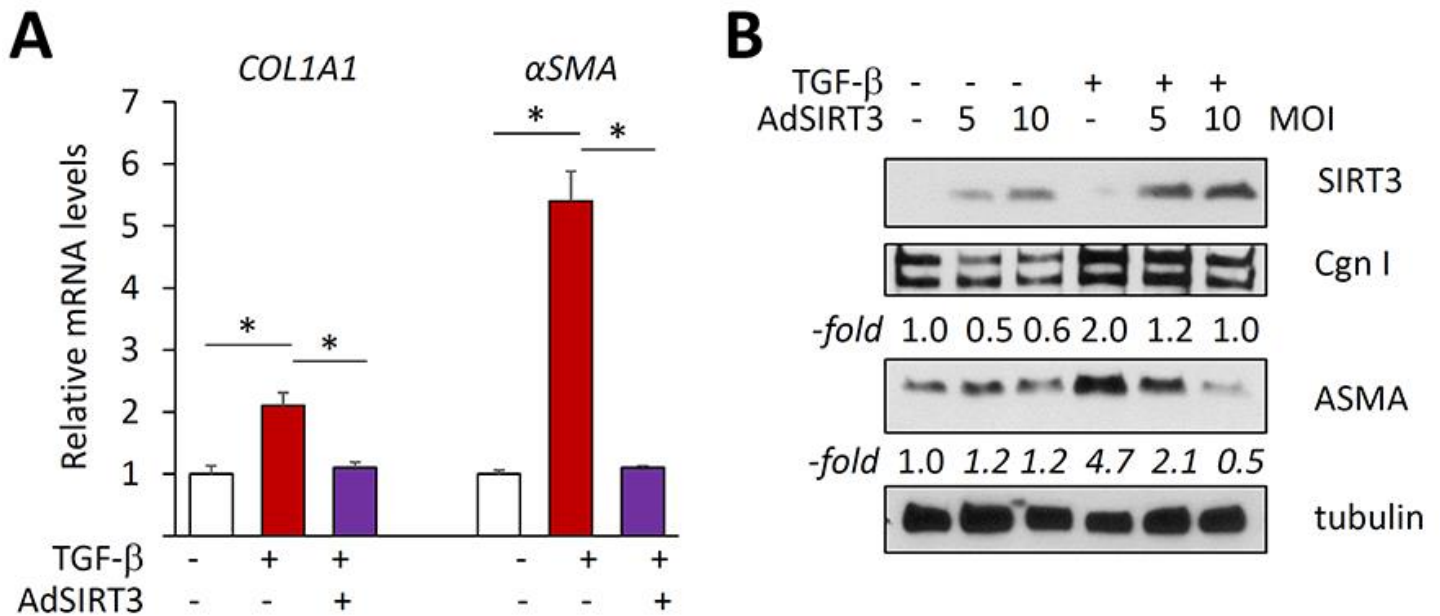

**Supplementary Figure 1. SIRT3 negatively regulates fibrotic responses in skin fibroblasts.** Normal human skin fibroblasts were infected with SIRT3 adenovirus (10 MOI or as indicated), and incubated with TGF- $\beta$ 2 (10 ng/ml) for 24 h. **A.** qRT-PCR. Results normalized with *GAPDH* are means  $\pm$  SD of triplicate determinations of an experiment representative of three. \* $p < 0.05$ . **B.** Western immunoblot of whole cell lysates. Images representative of duplicate experiments. -fold change in band intensities normalized for tubulin in each lane shown below. MOI, multiplicity of infection. Cgn I, Type I collagen.

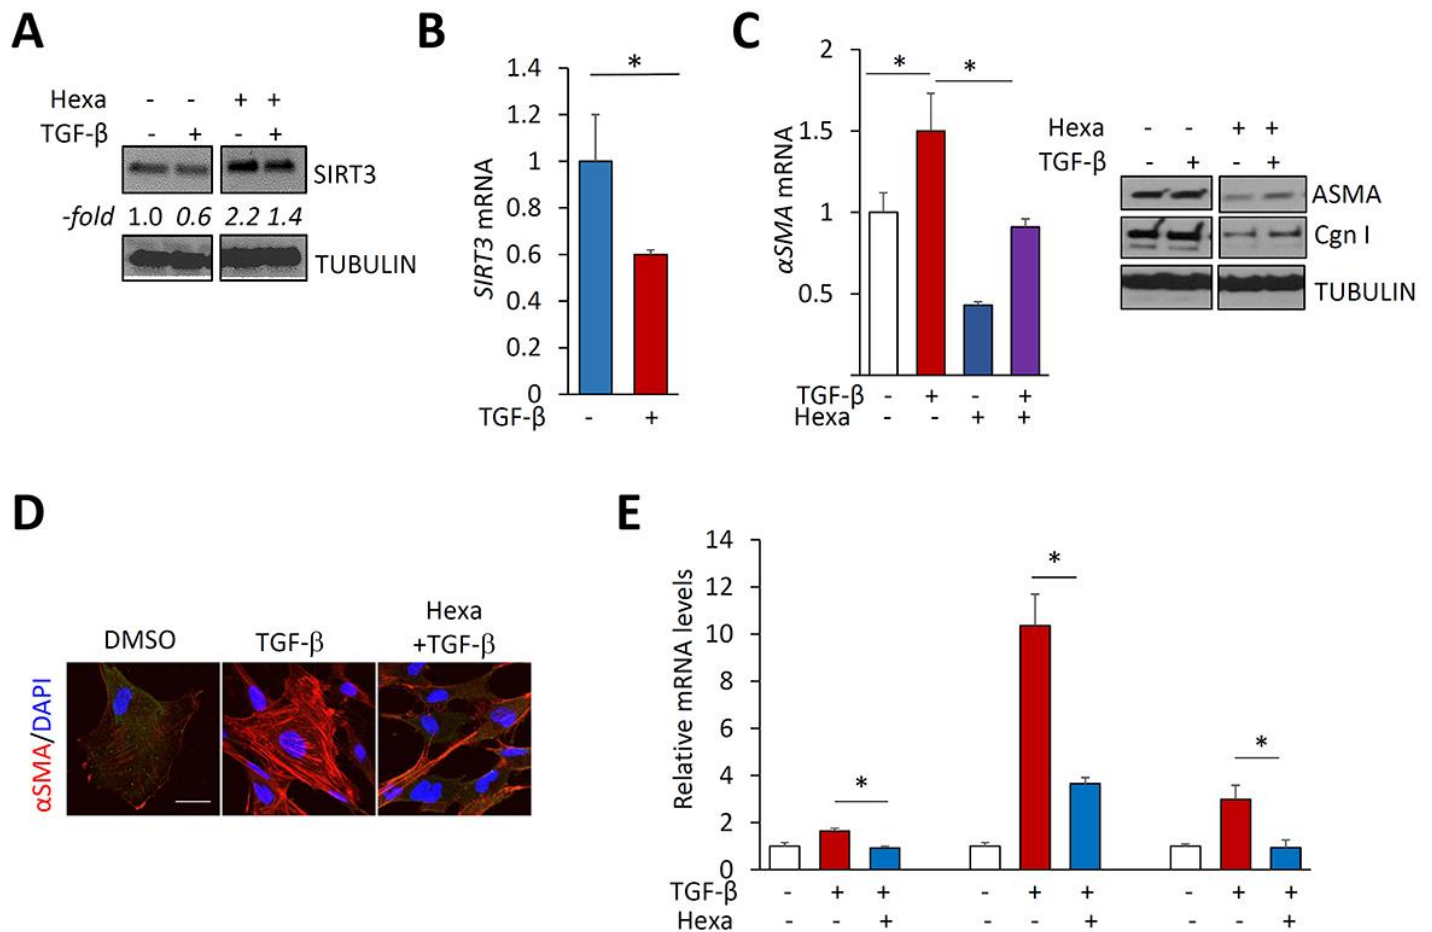

**Supplementary Figure 2. Hexafluoro abrogates basal and stimulated fibrotic gene expression in skin fibroblasts.** Human skin fibroblasts were preincubated with hexafluoro (10  $\mu$ M) for 30 min prior to TGF- $\beta$  (10 ng/ml) for 24 h, or hexafluoro was added to the cultures 24 h after TGF- $\beta$  (E). **A.** Western analysis. Representative images. -fold change in protein levels shown below. **B, E.** Real-time qPCR. Results are means  $\pm$  SD of triplicate determinations from an experiment representative of three; \* $p$ <0.05. **C.** Left panel, real-time qPCR results normalized with *GAPDH*. Means  $\pm$  SD of triplicate determinations. \* $p$ <0.05. Right panels, Western analysis of whole cell lysates. Representative images. Cgn I, Type I collagen. **D.** Immunofluorescence confocal microscopy with antibodies to  $\alpha$ SMA. Nuclei identified with DAPI. Representative images; bar =10  $\mu$ m.

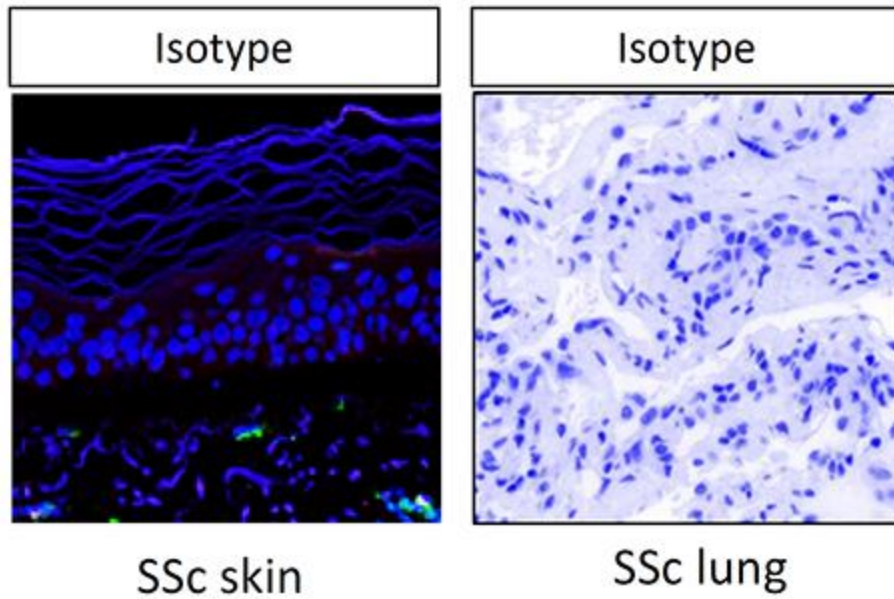

**Supplementary Figure 3. Isotype controls in skin and lung biopsies.** Isotype control IgG was used to replace primary Ac-MnSOD antibody; left, representative IF images in skin biopsies; right, IHC images of lung biopsies.
